# Supplementary material for: A Comparison of Regularization Methods in Forward and Backward Models for Auditory Attention Decoding
Source: PubMed Central journal article supplement (PMC6090837; doi:10.3389/fnins.2018.00531), 2018-08-07
Supplement: Data_Sheet_1.pdf [file Data_Sheet_1.pdf]

## APPENDIX

The effect of regularization parameters on regression accuracy are shown in figures A1 and A2. The eigenspectra of the audio and EEG autocovariance matrices are shown in figure A3.



**Figure A1.** Group-mean validation-set regression accuracies obtained with different forward/backward model estimation methods as the regularization parameters  $\lambda$  are varied. The left-hand and right-hand panel present results obtained with forward and backward models, respectively. The x axis shows the strength of the  $\lambda$  regularization parameters. The y axis shows the regression accuracies in terms of Pearson's correlation coefficients between estimated data and target data. The dashed line shows the regression accuracy for OLS.



**Figure A2.** Group-mean validation-set regression accuracies obtained from forward/backward models with elastic net penalties. The elastic net has two tuning parameters,  $\lambda$  and  $\alpha$ . The two panels show the group-mean validation set regression accuracies cross-validated over a relatively small grid of  $\lambda$  and  $\alpha$  values. The prediction accuracies remain stable over a large range of  $\lambda$  values. The dashed line shows the regression accuracy for OLS.



**Figure A3.** Normalized eigenspectra for speech and EEG autocovariance matrices ( $X^T X$ ). Bold black line is the average across subjects. Individual subjects are shown as thin dashed lines.
